# Supplementary material for: Does comorbidity burden explain the higher COVID-19 mortality risk among men? A retrospective cross-sectional analysis of a well-defined cohort of patients in Bronx, New York
Source: HighWire-hosted journal article supplement (doi:10.1136/bmjopen-2022-063862), 2022-09-01
Supplement: bmjopen-2022-063862supp001_data_supplement.pdf [file bmjopen-2022-063862supp001_data_supplement.pdf]

1 **Supplementary Table 1:** All-cause mortality stratified by age and gender in NYC from 2015-2018.

|                            | Female         | Male           |                                    | Female        | Male          |
|----------------------------|----------------|----------------|------------------------------------|---------------|---------------|
| <b>2015</b>                |                |                |                                    |               |               |
| <b>Total Population</b>    | 4,468,694      | 4,081,711      | <b>Total population ≥ 65 y/o</b>   | 667,759       | 459,256       |
| <b>All-cause mortality</b> | 27,646 (0.62%) | 26,140 (0.64%) | <b>All-cause mortality ≥65 y/o</b> | 22,143 (3.3%) | 17,495 (3.8%) |
| <b>2016</b>                |                |                |                                    |               |               |
| <b>Total Population</b>    | 4,462,674      | 4,074,999      | <b>Total population ≥ 65 y/o</b>   | 682,766       | 472,309       |
| <b>All-cause mortality</b> | 27,365 (0.61%) | 26,526 (0.65%) | <b>All-cause mortality ≥65 y/o</b> | 21,732 (3.2%) | 17,602 (3.7%) |
| <b>2017</b>                |                |                |                                    |               |               |
| <b>Total Population</b>    | 4,509,363      | 4,113,335      | <b>Total population ≥ 65 y/o</b>   | 728,204       | 506,817       |
| <b>All-cause mortality</b> | 27,280 (0.60%) | 26,525 (0.64%) | <b>All-cause mortality ≥65 y/o</b> | 21,942 (3.0%) | 17,780 (3.5%) |
| <b>2018</b>                |                |                |                                    |               |               |
| <b>Total Population</b>    | 4,392,779      | 4,005,969      | <b>Total population ≥ 65 y/o</b>   | 733,294       | 512,799       |
| <b>All-cause mortality</b> | 27,713 (0.63%) | 26,702 (0.67%) | <b>All-cause mortality ≥65 y/o</b> | 22,428 (3.1%) | 18,087 (3.5%) |

2

3 **Supplementary Table 2:** Rates of city-wide COVID-19 cases, hospitalizations and deaths from  
4 February 29-June 1, 2020 for men vs women

|                                        | Female        | Male           |
|----------------------------------------|---------------|----------------|
| <b>Total population of NYC in 2020</b> | 4,604,591     | 4,199,598      |
| <b>COVID cases</b>                     | 98,992 (2.1%) | 104,675 (2.5%) |
| <b>Hospitalizations</b>                | 23,612 (0.5%) | 30,589 (0.7%)  |
| <b>Deaths</b>                          | 7,494 (0.16%) | 11,183 (0.27%) |

5

6

7

8

9

10

11

12

13

14

15

16 **Supplementary Table 3:** COVID deaths and all-cause deaths for New York State and United States  
 17 stratified by age and gender.

|                                          | New York State<br>(≥18 years old) | New York State<br>(≥65 years old) |                                          | United States<br>(≥18 years old) | United States<br>(≥65 years old) |
|------------------------------------------|-----------------------------------|-----------------------------------|------------------------------------------|----------------------------------|----------------------------------|
| <b>COVID deaths<br/>(men: women)</b>     | 18,616 / 16,681=<br>1.12          | 14,340 / 14,318 =<br>1.00         | <b>COVID deaths<br/>(men: women)</b>     | 539,109/ 434,210 =<br>1.24       | 384,144/ 340,914 =<br>1.13       |
| <b>All-cause deaths<br/>(men: women)</b> | 130,982 / 127,508=<br>1.02        | 96,151 / 107,640=<br>0.89         | <b>All-cause deaths<br/>(men: women)</b> | 3,920,042/ 3,526,332 =<br>1.11   | 2,692,587/ 2,819,106 =<br>0.96   |

18

19

20

21

22

23

24

25

26

27

28

29

30

31

32

33

34

35

36

37

38

39

40 Sensitivity analyses using continuous and categorical variables for age and Charlson score in the  
41 stratified regression models found the following (of note, all of these models adjusted for race  
42 (non-Hispanic White, non-Hispanic Black, Hispanic and Other) as a categorical variable, diabetes  
43 (yes or no) as a categorical variable, hypertension (yes or no) as a categorical variable, asthma  
44 (yes or no) as a categorical variable and smoking (no, former and current) as a categorical  
45 variable):

46 When age decile and Charlson score as a continuous variable were used in the multivariate  
47 models, the point estimates for odds of male death during pre-covid and covid were: 1.35  
48 (1.04-1.75) and 2.02 (1.74-2.35). When age as a continuous variable and Charlson score as a  
49 continuous variable were used in the multivariate models, the point estimates for odds of male  
50 death during pre-covid and covid were: 1.37 (1.06-1.77) and 2.05 (1.77-2.39) respectively.  
51 When age decile and Charlson score as a categorical variable (see Table 1 on page 9) were used  
52 in the multivariate models, the point estimates for odds of male death during pre-covid and  
53 covid were 1.49(1.16-1.93) and 2.07(1.78-2.41) respectively.

54

55
